# Supplementary material for: Modification of back interfacial contact with MoO3 layer in situ introduced by Na2S aqueous solution for efficient kesterite CZTSSe solar cells
Source: Royal Society of Chemistry journal article supplement (doi:10.1039/d3tc00378g), 2023-01-01
Supplement: d3tc00378g1.pdf [file d3tc00378g1.pdf]

## Supporting Information

# Modification of back interfacial contact with MoO<sub>3</sub> layer in-situ introduced by Na<sub>2</sub>S aqueous solution for efficient kesterite CZTSSe solar cells

Yue Jian, Tianliang Xie, Litao Han\*, Dongxing Kou, Wenhui Zhou, Zhengji Zhou, Shengjie Yuan, Yuena Meng, Yafang Qi, and Sixin Wu\*.

Key Laboratory for Special Functional Materials of MOE, National & Local Joint Engineering Research Center for High-efficiency Display and Lighting Technology, Collaborative Innovation Center of Nano Functional Materials and Applications, School of Materials, Henan University, Kaifeng 475004, P. R. China.

\*E-mail: hlt@henu.edu.cn; wusixin@henu.edu.cn.

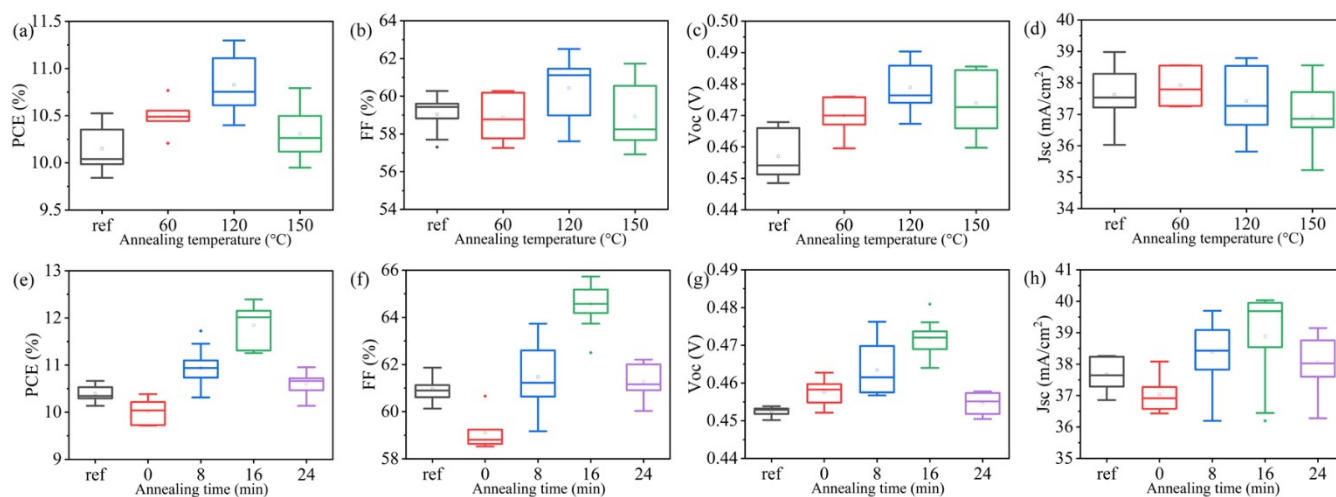

**Figure S1.** Photovoltaic parameters of the devices fabricated on the Mo substrate with Na<sub>2</sub>S layer annealed at different temperature: a) PCE, b) FF, c) V<sub>OC</sub> and d) J<sub>SC</sub>, and annealed for different time: e) PCE, f) FF, g) V<sub>OC</sub> and h) J<sub>SC</sub>.

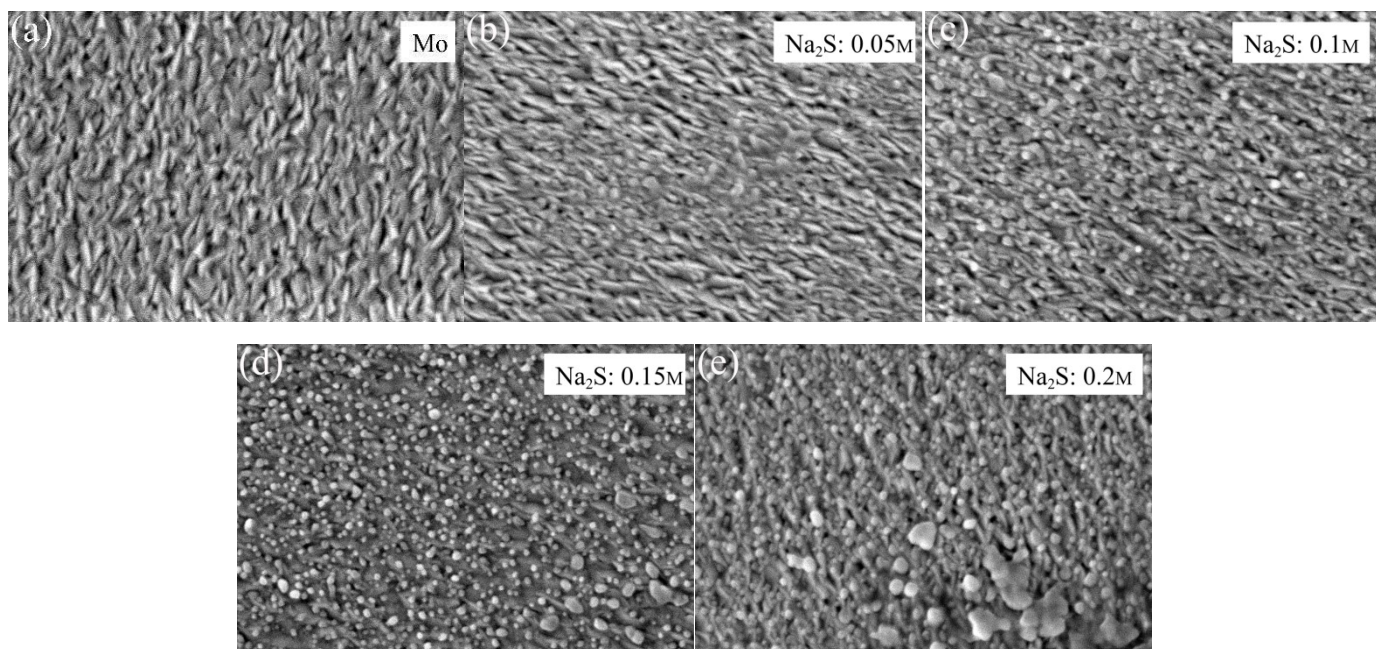

**Figure S2.** The morphologies of spin-coated  $\text{Na}_2\text{S}$  on Mo surface with various mole ratios: a) 0 M, b) 0.05 M, c) 0.1 M, d) 0.15 M, e) 0.2 M.

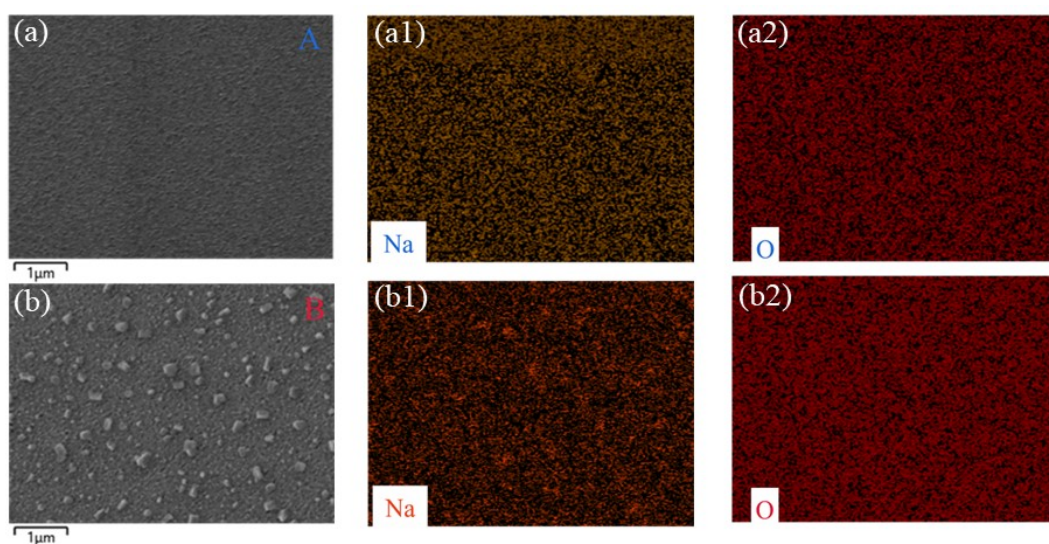

**Figure S3.** EDS maps of the substrate (a) A and (b) B.

Table S1. Quantitative EDX analysis of Na, Mo and O content for back contact surfaces of A and B.

| Substrate | Mo    | O     | Na   | S    |
|-----------|-------|-------|------|------|
| A         | 88.94 | 11.06 | 0    | 0    |
| B         | 76.37 | 21.26 | 1.39 | 0.98 |

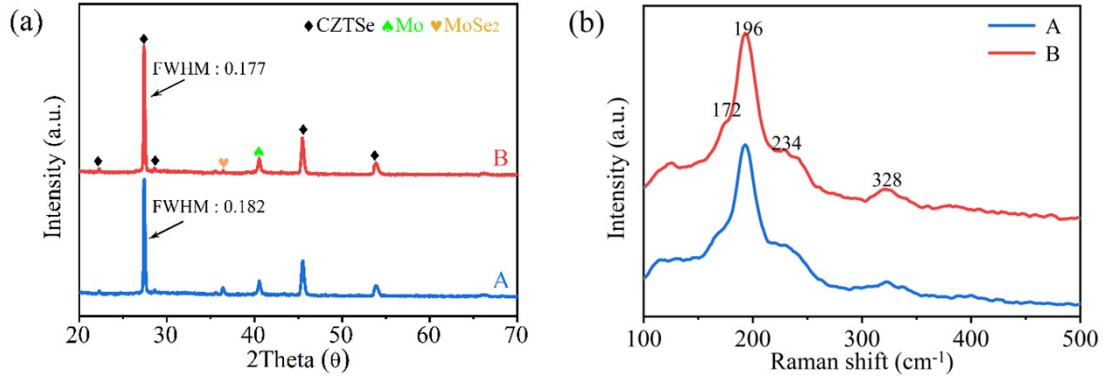

**Figure S4.** (a) XRD spectra of CZTSSe film without (A) and with (B) Na<sub>2</sub>S layer. (b) Raman spectra of the film A and B.

The intensity of (112) diffraction peaks of CZTSSe located at 27.18° (JCPDS#52-0868) increases a little on substrate B.

And there is a narrowing of the FWHM from 0.182 for film A to 0.177 for film B, suggesting the improved crystalline

quality. The crystalline quality is further revealed by Raman measurement. In addition, XRD and Raman spectroscopy

demonstrates that the Na<sub>2</sub>S aqueous solution does not cause the formation of secondary phase in the absorber layer.

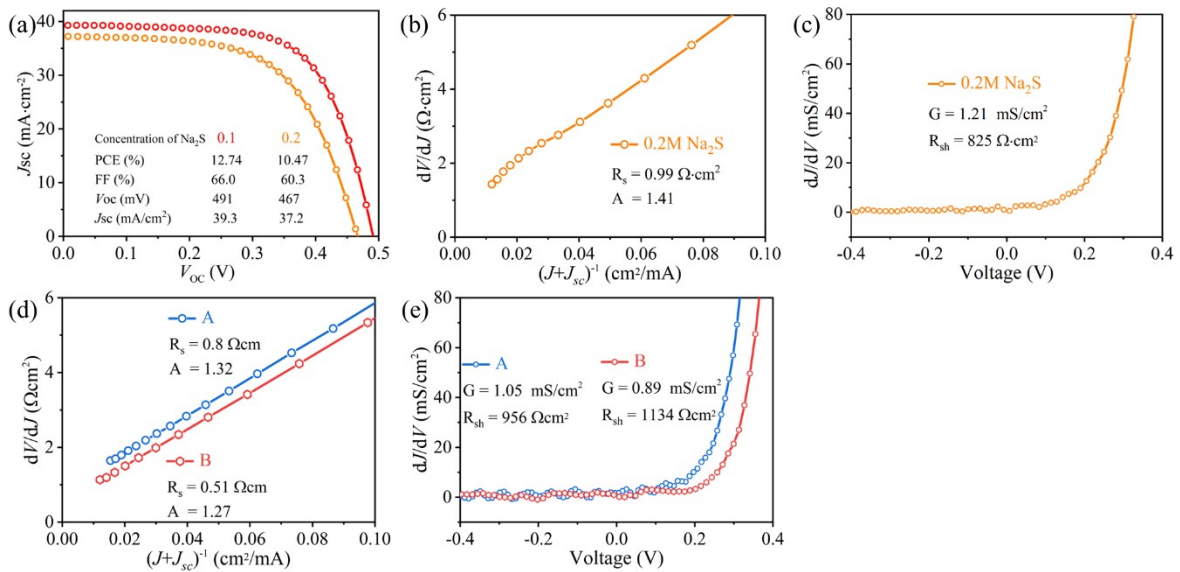

**Figure S5 .** (a) J-V curves of the champion devices prepared on the substrates treated with 0.1 M and 0.2 M Na<sub>2</sub>S; (b) dV/dJ

vs (J + J<sub>sc</sub>)<sup>-1</sup> and (c) dJ/dV vs V redrawn from the standard light J-V curves of the champion device prepared on the

substrates treated with 0.2 M Na<sub>2</sub>S; Plots of (d) dV/dJ vs (J + J<sub>sc</sub>)<sup>-1</sup> and (e) dJ/dV vs V redrawn from the standard light J-V

curves of device A and B (0.1 M Na<sub>2</sub>S).

Table S2. The photovoltaic parameters of the champion device prepared on the substrates treated with 0.1 M and 0.2 M

Na<sub>2</sub>S. Both devices were fabricated from the same batch.

| Concentration of Na <sub>2</sub> S | $PCE_{max}$ [%] | $V_{OC}$ [mV] | $J_{SC}$ [mA/cm <sup>2</sup> ] | $FF$ [%] | $R_s$ [ $\Omega \cdot \text{cm}^2$ ] | $R_{sh}$ [ $\Omega \cdot \text{cm}^2$ ] | $G_{sh}$ [mS $\cdot \text{cm}^2$ ] |
|------------------------------------|-----------------|---------------|--------------------------------|----------|--------------------------------------|-----------------------------------------|------------------------------------|
| 0.1 M                              | 12.74           | 491           | 39.3                           | 66.0     | 0.51                                 | 1113                                    | 0.90                               |
| 0.2 M                              | 10.47           | 467           | 37.2                           | 60.3     | 0.99                                 | 825                                     | 1.21                               |

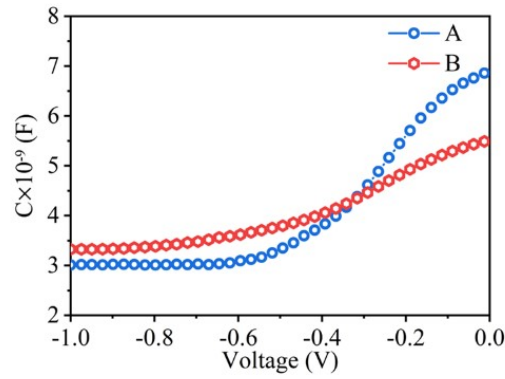

Figure S6. C-V curves of the champion device A and B.

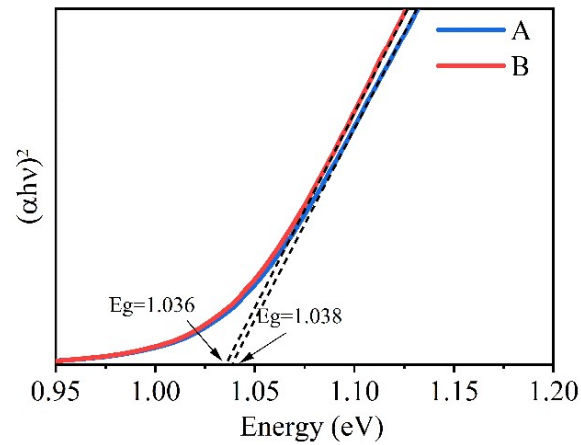

Figure S7. The optical band gap of the film A (1.036 eV) and B (1.038 eV) calculated from the UV-vis transmission spectra. The Na<sub>2</sub>S layer spin-coated on the Mo substrate will not change the band gap of the CZTSSe absorbers.
